# Supplementary material
Source: PubMed Central journal article supplement (PMC4878189)
Supplement: 10.1194_M067942_jlr.M067942-1.pdf [file 10.1194_M067942_jlr.M067942-1.pdf]

### **Legend to the supplementary figures**

**Figure 1S.** Scattergrams depicting the distribution of sebum excretion rates (SER) in the study participants according to their clinical severity grade. The red line and cross represent the median and mean values, respectively. \* $p \leq 0.05$  indicated statistically significant differences towards clear participants calculated by analysis of variance (ANOVA) following post-hoc HSD Tukey's test.

**Figure 2S.** Eulero-Venn's diagram depicting the number of entities that were commonly modified in the respective severity grades compared to unaffected sebum with a  $FC \geq 2$ .

**Figure 3S.** MS spectra of diglycerides (DGs) differently regulated in acne sebum according to the severity grade.

Table 1S Demographic characteristics of study participants

| GRADING      | SIZE      | %          | <sup>1</sup> AGE (MEAN ± SD) | <sup>2</sup> SER (MEAN ± SD) |
|--------------|-----------|------------|------------------------------|------------------------------|
| CLEAR        | 17        | 27.9       | 14.1 ± 1.2                   | 4.1 ± 2.2                    |
| MILD         | 13        | 21.3       | 13.5 ± 1.1                   | 4.6 ± 1.7                    |
| MODERATE     | 19        | 31.1       | 14.2 ± 1.8                   | 5.7 ± 3.0                    |
| SEVERE       | 12        | 19.7       | 15.2 ± 1.8                   | 7.2 ± 2.5*                   |
| <b>TOTAL</b> | <b>61</b> | <b>100</b> | 14.2 ± 1.6                   | 5.3 ± 2.7                    |

| GRADING      | F         | %           | <sup>1</sup> AGE (MEAN ± SD) | <sup>2</sup> SER (MEAN ± SD) |
|--------------|-----------|-------------|------------------------------|------------------------------|
| CLEAR        | 10        | 16.4        | 14.2 ± 1.3                   | 4.3 ± 2.6                    |
| MILD         | 8         | 13.1        | 13.5 ± 1.4                   | 4.6 ± 1.7                    |
| MODERATE     | 12        | 19.7        | 14.3 ± 2.2                   | 4.3 ± 1.5                    |
| SEVERE       | 2         | 3.3         | 14.0 ± 1.4                   | 7.3 ± 1.7*                   |
| <b>TOTAL</b> | <b>32</b> | <b>52.5</b> | 14.1 ± 1.7                   | 4.8 ± 2.2                    |

| GRADING      | M         | %           | <sup>1</sup> AGE (MEAN ± SD) | <sup>2</sup> SER (MEAN ± SD) |
|--------------|-----------|-------------|------------------------------|------------------------------|
| CLEAR        | 7         | 11.5        | 14.0 ± 1.0                   | 3.9 ± 1.6                    |
| MILD         | 5         | 8.2         | 13.6 ± 0.5                   | 4.6 ± 1.7                    |
| MODERATE     | 7         | 11.5        | 13.9 ± 0.9                   | 5.2 ± 2.0                    |
| SEVERE       | 10        | 16.4        | 15.4 ± 1.8                   | 7.2 ± 2.7*                   |
| <b>TOTAL</b> | <b>29</b> | <b>47.5</b> | 14.4 ± 1.4                   | 5.9 ± 3.0                    |

<sup>1</sup>In years

<sup>2</sup>SER= Sebum excretion rate (µg/cm<sup>2</sup>/minute)

\*p<0.05, significance of difference between clear and acne grade calculated with ANOVA with post-hoc HSD Tukey's test.

Table 2S. List of the shared lipid species in the Eulero-Venn's diagram (Supplementary Figure 2S)

| <b>Lipid class</b> | <b>Elemental formula or annotation</b> | <b>RT*</b> | <b>MILD</b> | <b>MODERATE</b> | <b>SEVERE</b> |
|--------------------|----------------------------------------|------------|-------------|-----------------|---------------|
| Fatty acyls        | C21H36O5                               | 8.4710     |             | #               | #             |
| Fatty acyls        | C27H36O                                | 16.418     | #           | #               | #             |
| Fatty acyls        | C21H36O5                               | 8.4710     |             | #               | #             |
| Fatty acyls        | C40H56O                                | 21.803     |             | #               | #             |
| Glycerolipids      | DG 30:1                                | 22.999     |             | #               | #             |
| Glycerolipids      | MG 16:0**                              | 23.699     |             | #               | #             |
| Glycerolipids      | DG 31:1                                | 23.889     |             | #               | #             |
| Glycerolipids      | DG 32:1                                | 24.602     |             | #               | #             |
| Glycerolipids      | DG 34:1                                | 25.799     |             | #               | #             |

\*RT= retention time in minutes

\*\*Interpreted as a fragment of FA 16:0-bearing DGs

#Fold change > 2

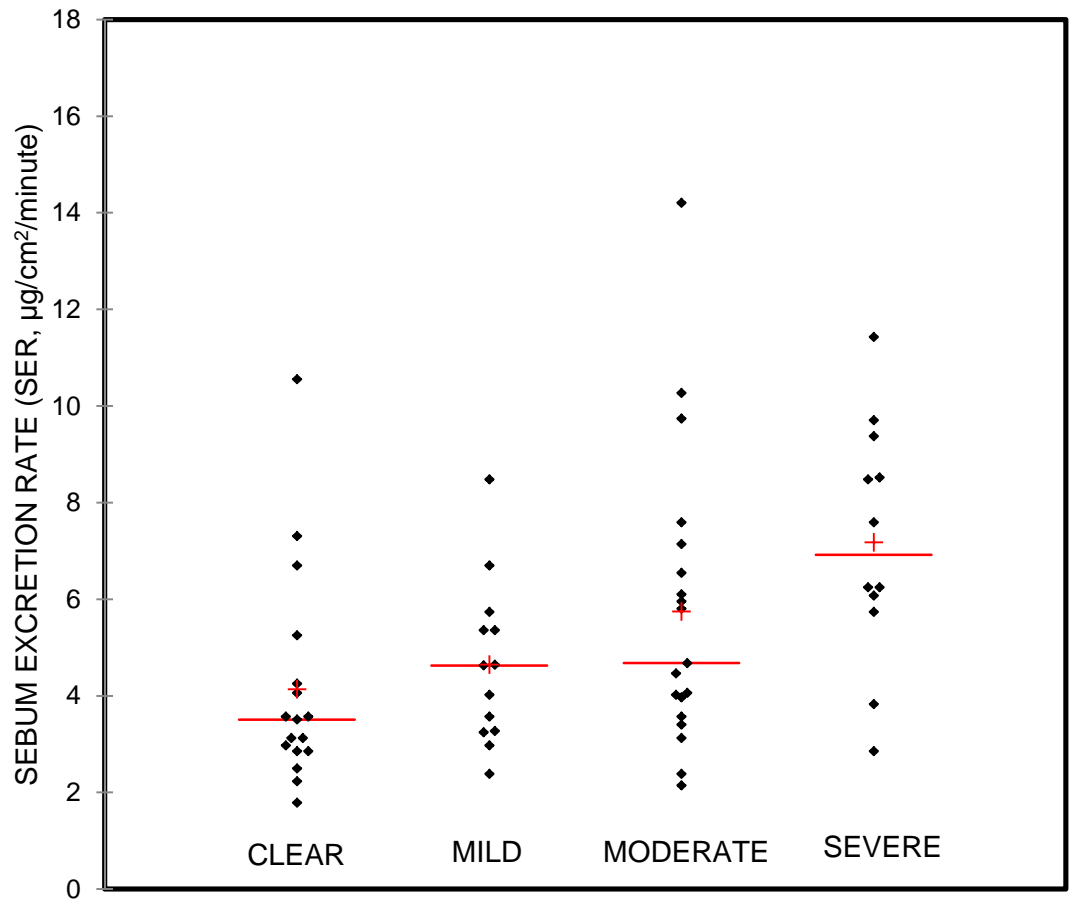

Supplementary Figure 1S

Entity List 1 : (6) T Test  
unpaired [MILD] Vs [CLEAR] P  
<= 0.05 FC >=2.0  
6 entities

Entity List 2 : (95) T Test  
unpaired [MODERATE] Vs  
[CLEAR] P <= 0.05 FC >=2.0  
95 entities

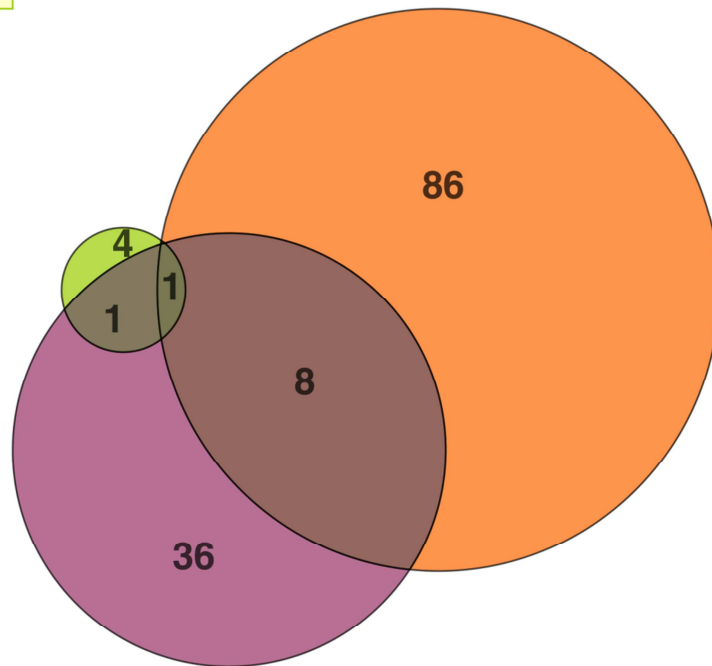

Entity List 3 : (46) T Test  
unpaired [SEVERE] Vs [CLEAR]  
P <= 0.05 FC >=2.0  
46 entities

Supplementary Figure 2S

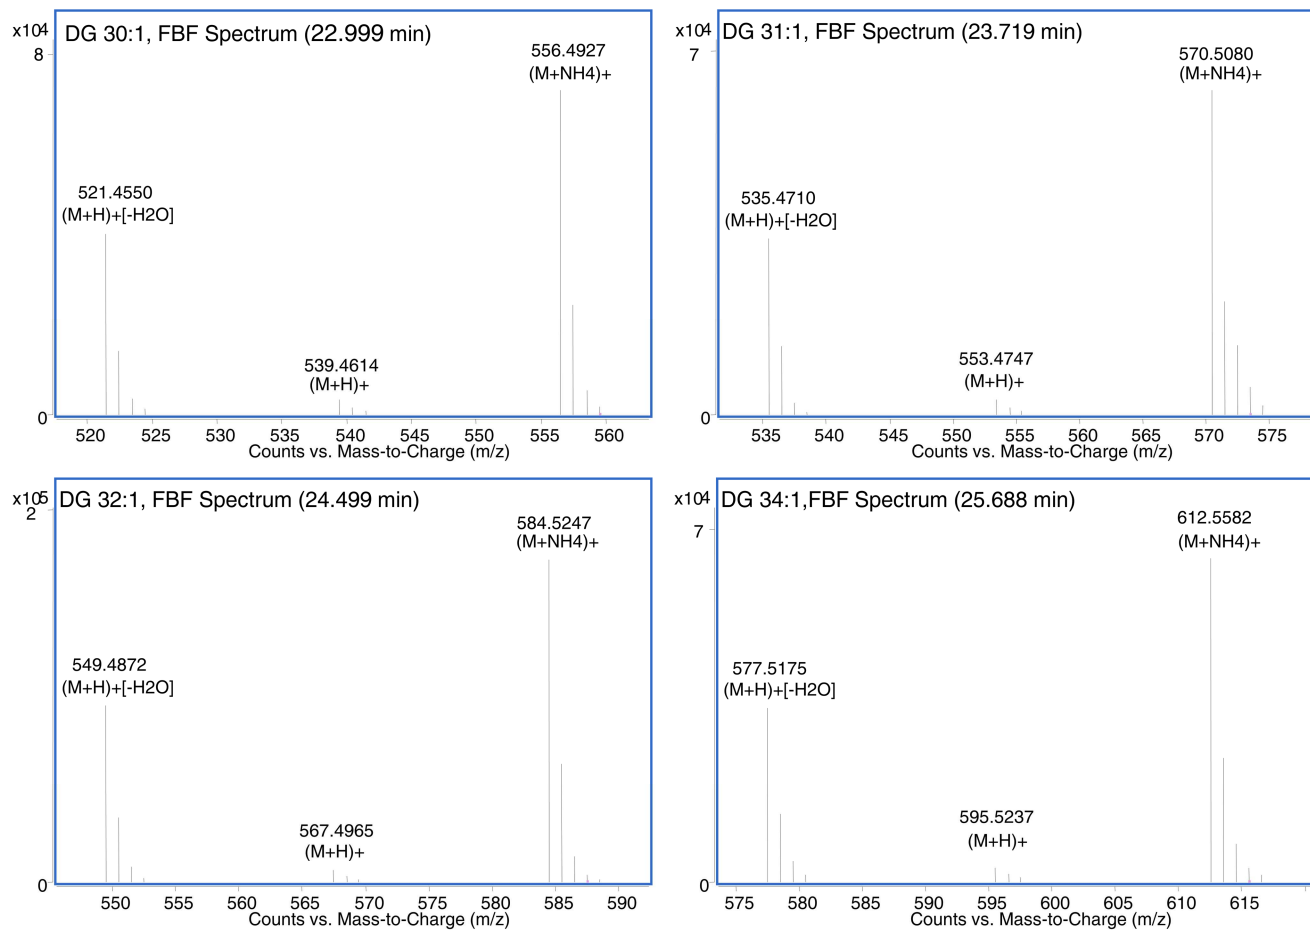

Supplementary Figure 3S
